# Supplementary material for: Endothelial basement membrane laminin 511 is essential for shear stress response
Source: PubMed Central journal article supplement — EMBO J. 2016 Dec 9;36(2):183–201. doi: 10.15252/embj.201694756 (PMC5239996; doi:10.15252/embj.201694756), 2016-12-09
Supplement: EMBJ-36-183-s001.pdf [file EMBJ-36-183-s001.pdf]

## **Table of Content**

|                           |    |
|---------------------------|----|
| Appendix figure S1        | 1  |
| Appendix figure S1 legend | 2  |
| Appendix figure S2        | 3  |
| Appendix figure S2 legend | 4  |
| Appendix figure S3        | 5  |
| Appendix figure S3 legend | 6  |
| Appendix figure S4        | 7  |
| Appendix figure S4 legend | 8  |
| Appendix figure S5        | 9  |
| Appendix figure S5 legend | 10 |
| Appendix figure S6        | 11 |
| Appendix figure S6 legend | 12 |

**a**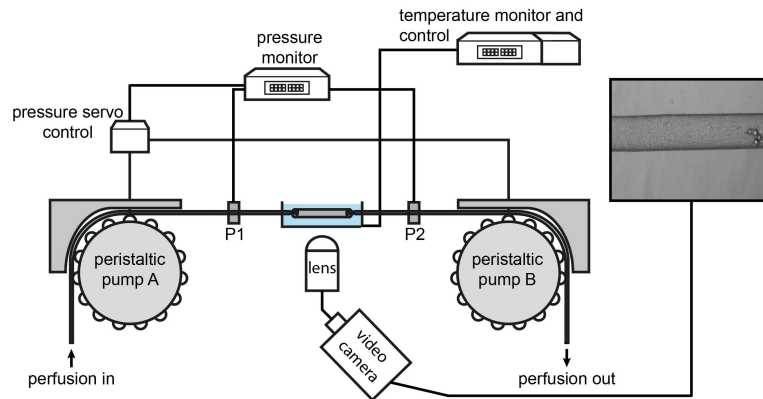**b**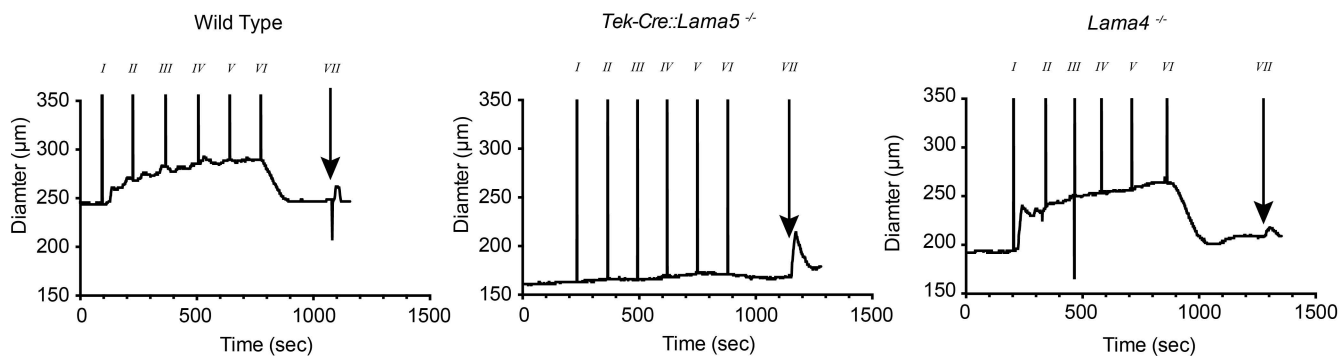**c**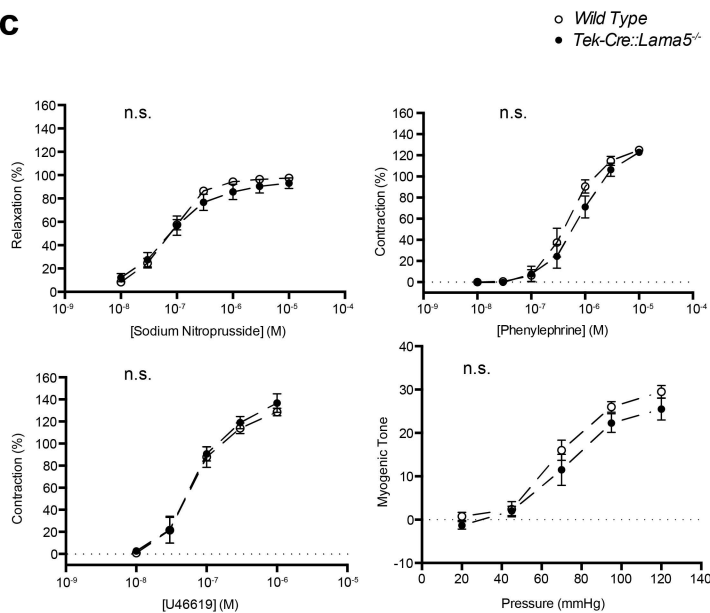**d**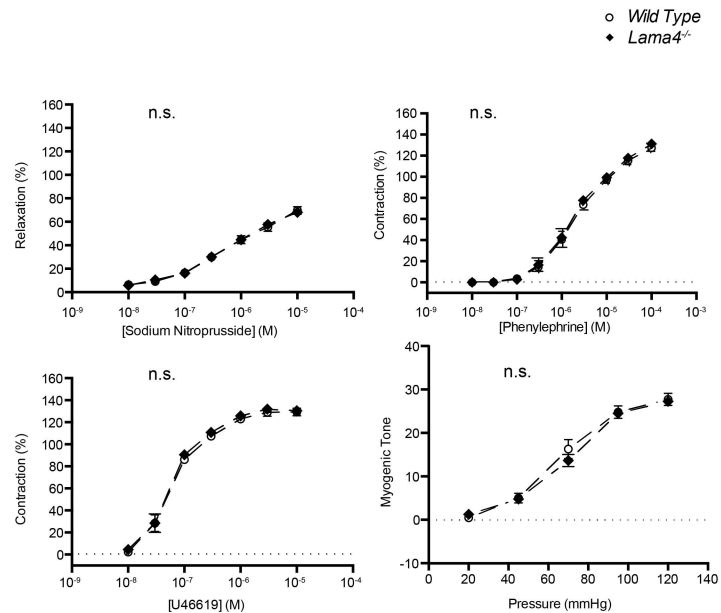

**Fig S1 The set-up of flow-induced dilation experiments and functional analyses**

**of laminin KO mesenteric resistance arteries.** a) The pressure myograph setup employed to study flow-induced dilatory response of excised arteries. During the experiment the intraluminal pressure was monitored by two pressure transducers (P1 and P2) and kept constant through the use of a servo control system connected to peristaltic pump A. Intraluminal flow was applied through peristaltic pump B. The vessels behaviour was monitored continuously using a digital camera connected to an inverted microscope. b) Representative diameter-time relation of cannulated wild type, *Tek-Cre::Lama5<sup>-/-</sup>* and *Lama4<sup>-/-</sup>* arteries during the flow-induced dilation experiment. The vessels were subjected to 2.5 (I), 5 (II), 10 (III), 20 (IV), 40 (V) dyn/cm<sup>2</sup> of shear stress and set back to 0 (VI). After each experiment the viability of the endothelium was tested by the addition of 10 μM of acetylcholine to the bath (VII). Functional analyses of mesenteric resistance arteries from wild type and *Tek-Cre::Lama5<sup>-/-</sup>* mice (c) and wild type and *Lama4<sup>-/-</sup>* mice (d) in response to increasing doses of a vasodilatory drug (sodium nitroprusside), vasoconstrictory drugs (U46619, phenylephrine) and intraluminal pressure. The analyses show comparable behaviour in wild type, *Tek-Cre::Lama5<sup>-/-</sup>* and *Lama4<sup>-/-</sup>* arteries. n.s = not significant. Data are expressed as percentage of the maximum force developed either in presence of 0.3 μM U46619 (relaxation %) or in KPSS buffer alone (contraction %). Data are mean responses ± s.e.m from 7 experiments with 1 wild type and 1 KO artery in each experiment.

**A**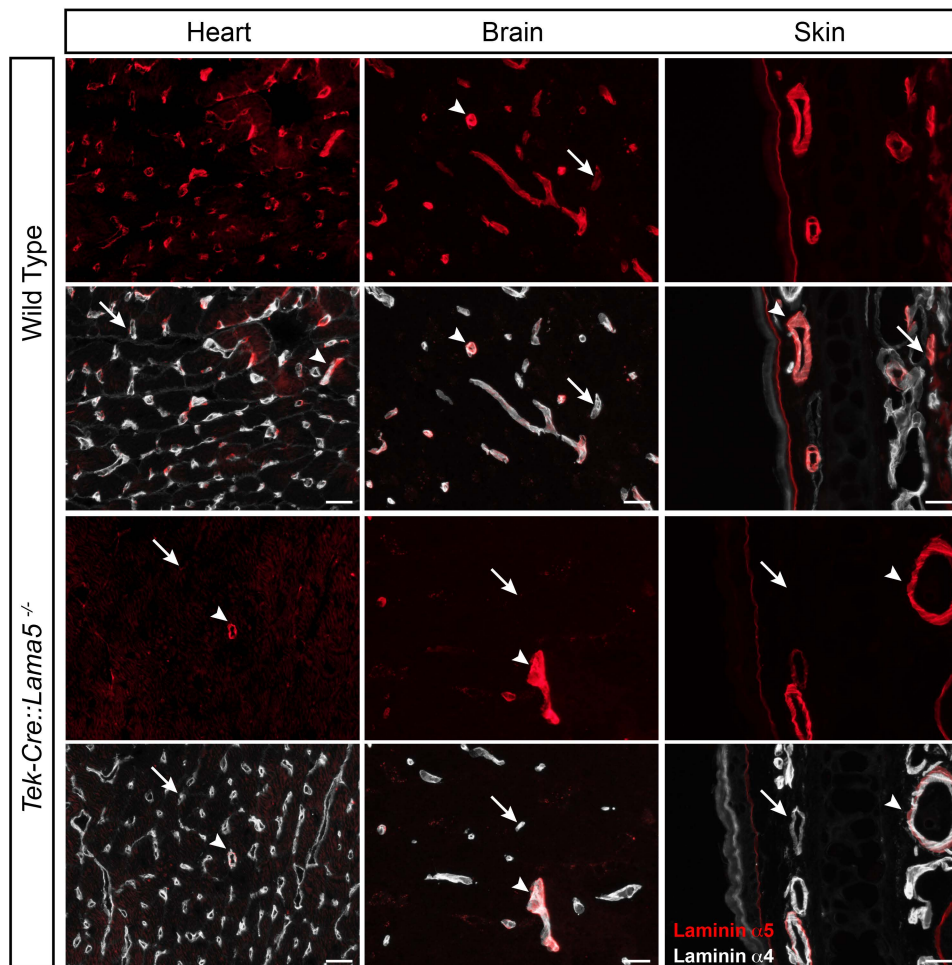**B**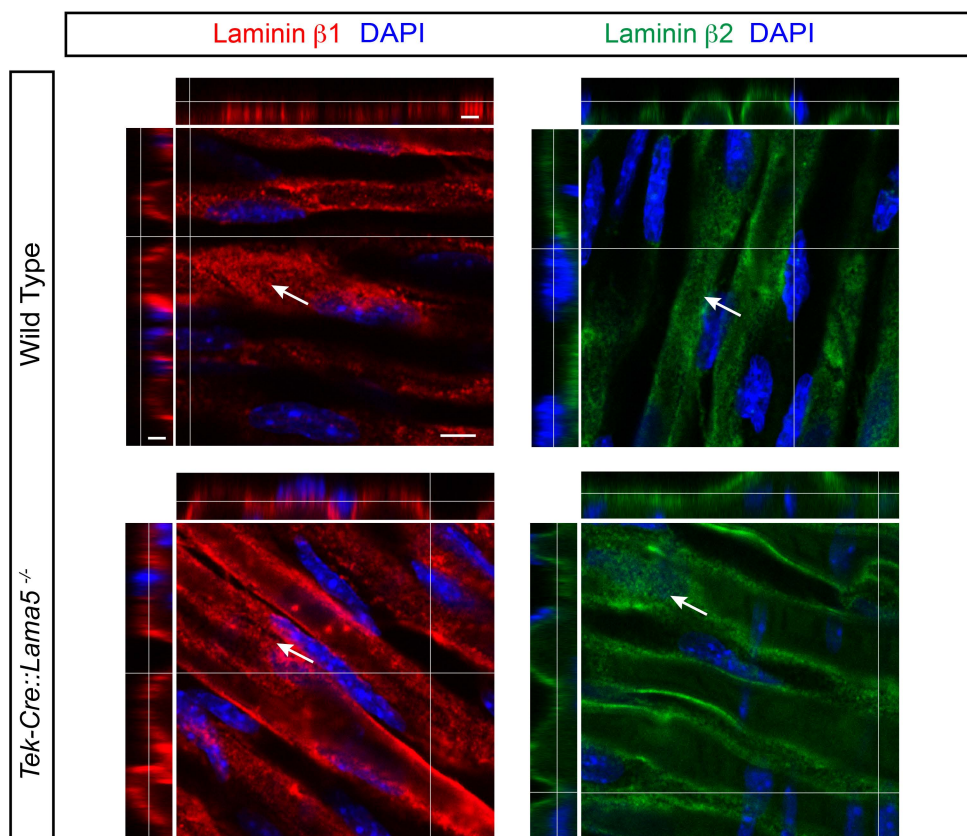

**Fig S2 The characterization of endothelial basement membrane components in *Tek-Cre::Lama5<sup>-/-</sup>* mouse did not reveal major differences. A)**

Immunofluorescence staining for laminin  $\alpha 5$  (red) and laminin  $\alpha 4$  (white) in  $5\mu\text{m}$  sections of heart, brain and skin from wild type and *Tek-Cre::Lama5<sup>-/-</sup>* mice, showing the absence of laminin  $\alpha 5$  in endothelial basement membranes of *Tek-Cre::Lama5<sup>-/-</sup>* tissues (arrows), while the presence of laminin  $\alpha 4$  was not altered. Laminin  $\alpha 5$  is however detectable in the smooth muscle layers of larger vessels (arrow heads) of both wild type and *Tek-Cre::Lama5<sup>-/-</sup>* mice. Scale bars are  $20\mu\text{m}$ . B) Orthogonal view of confocal images of wild type and *Tek-Cre::Lama5<sup>-/-</sup>* mesenteric resistance arteries stained with laminin  $\beta 1$  and laminin  $\beta 2$ . The comparison of the stainings shows no difference in pattern and intensity in endothelial basement membranes (arrows). Scale bar are  $5\mu\text{m}$  in XY plane and  $2.5\mu\text{m}$  in ZY/ZX planes.

**A**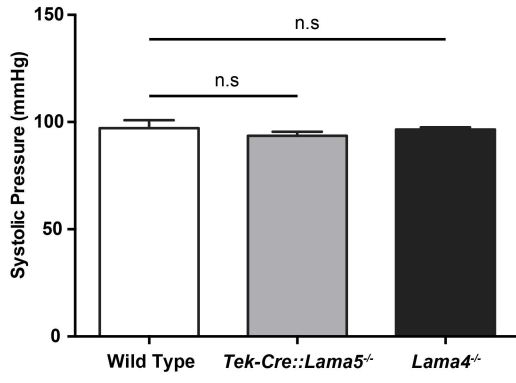**B**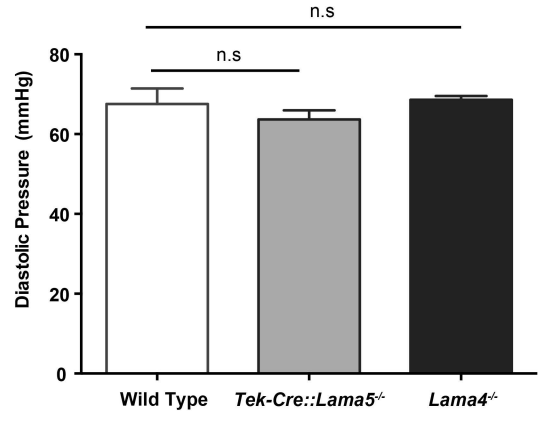

**Fig S3 Comparable systolic and diastolic mean blood pressure between wild type and laminin KO mice.** Systolic (A) and diastolic (B) mean blood pressure measurements in anesthetized mice, show no detectable differences between wild type, *Tek-Cre::Lama5<sup>-/-</sup>* and *Lama4<sup>-/-</sup>* mice. Data are means  $\pm$  s.e.m from 10 mice each genotype. n.s. = not significant.

**A**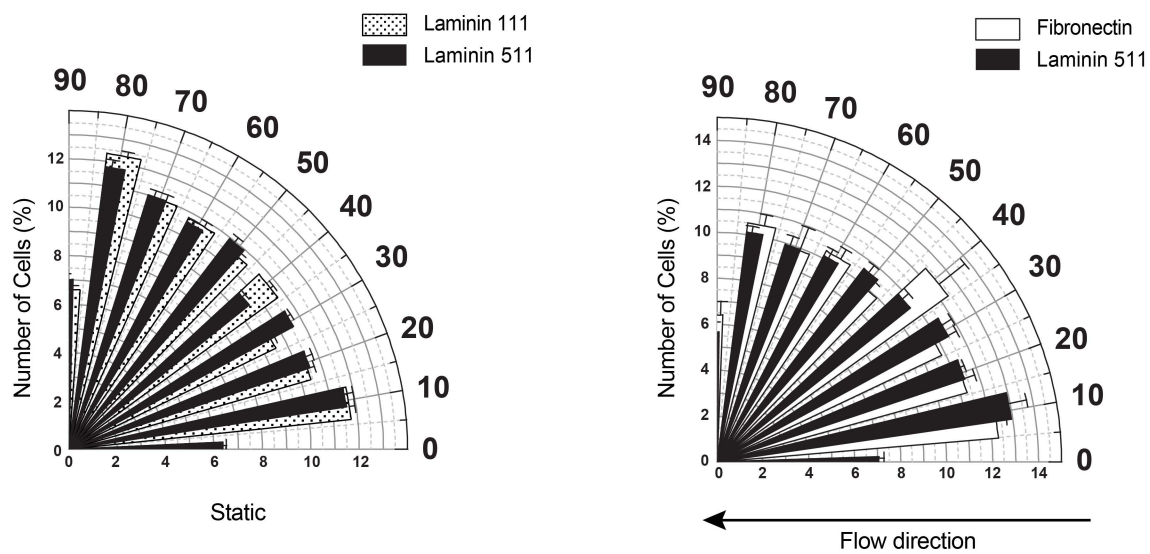**B**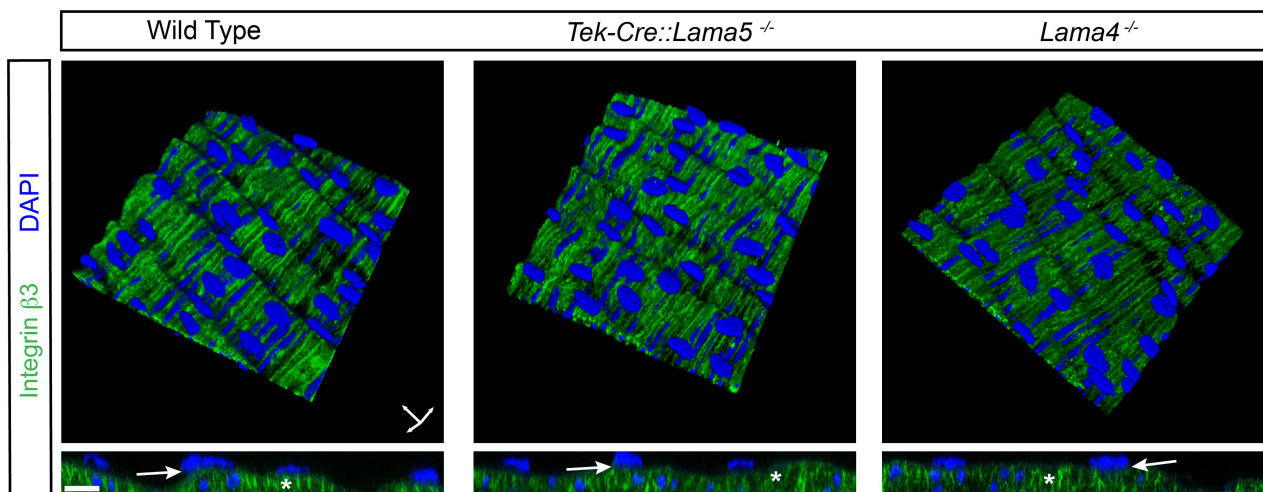



**Fig S4 HUAECs align under shear stress and integrin  $\beta$ 3 absence in endothelial cells of mesenteric resistance arteries.** A) Angle histogram of HUAECs orientation after 120 min of static culture condition or 10dyn/cm<sup>2</sup> shear . Comparisons were made between cells plated on the same molar concentrations (25 nM) of laminin 511 and 111, or laminin 511 and fibronectin. Data are means  $\pm$  s.e.m of 6 independent experiments. B) Whole mount staining of arteries from wild type, *Tek-Cre::Lama5*<sup>-/-</sup> and *Lama4*<sup>-/-</sup> mice show the absence of integrin  $\beta$ 3 staining on endothelial cells (arrow), but its presence in the smooth muscle layer (asterisk). Scale bars are 10 $\mu$ m.

**A**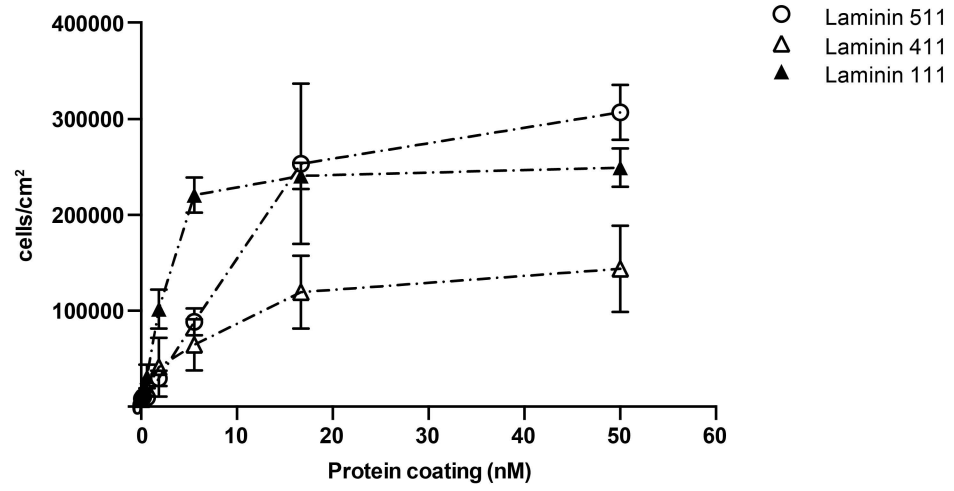**B**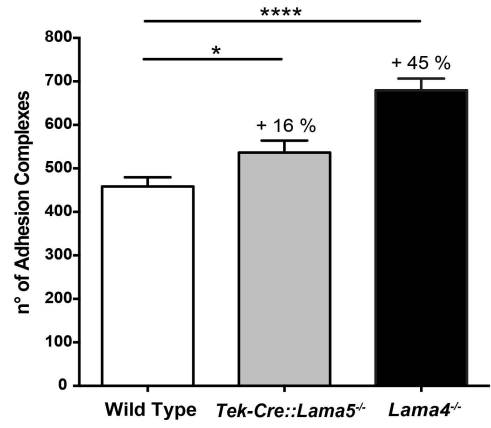**C**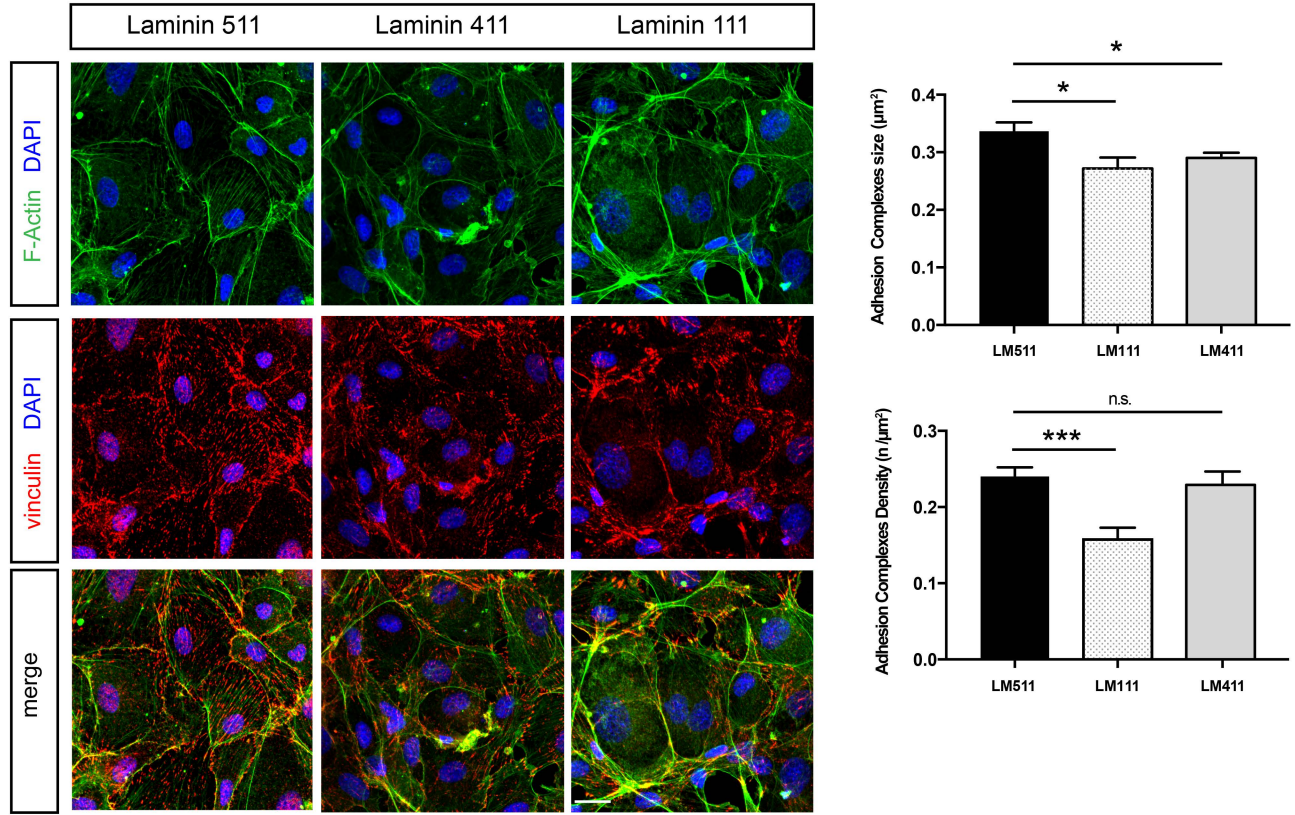

**Fig S5 *In vitro* adhesion of mouse sEND.1 cells and HUAECs to different laminin isoform.** A) *In vitro* cell adhesion assays employing mouse sEND.1 cells plated on increasing concentrations of purified laminin 411 and 511, compared to the non-endothelial cell laminin 111, showing high levels of sEND.1 adhesion to laminin 511 and low binding to laminin 411, comparable to the data obtained with HUAECs. Data are means  $\pm$  s.e.m from 3 experiments with triplicates/experiments. B) Quantification of the number of adhesion complexes per endothelial cell in wild type, *Tek-Cre::Lama5<sup>-/-</sup>* and *Lama4<sup>-/-</sup>* mesenteric arteries. Data are means  $\pm$  s.e.m from 300 cells from 9 wild type and 9 KO arteries isolated from 3 mice/genotype. C) Double immunofluorescence staining of vinculin and F-actin in HUAECs seeded on laminins 511, 111 and 411. DAPI reveals nuclei. Bar graphs show the quantification of sizes and density of cellular adhesion complexes. Data are means  $\pm$  s.e.m from at least 24 cells each condition from 3 independent experiments. \*P<0.05, \*\*\*P<0.001, \*\*\*\*P<0.0001, unpaired t-test. Scale bar is 10  $\mu$ m.

**A**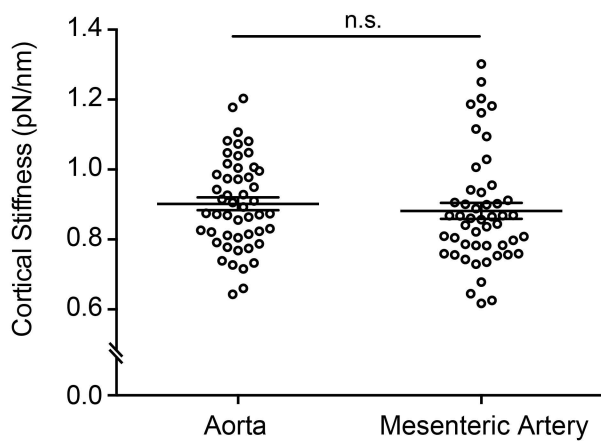**B****sEND.1**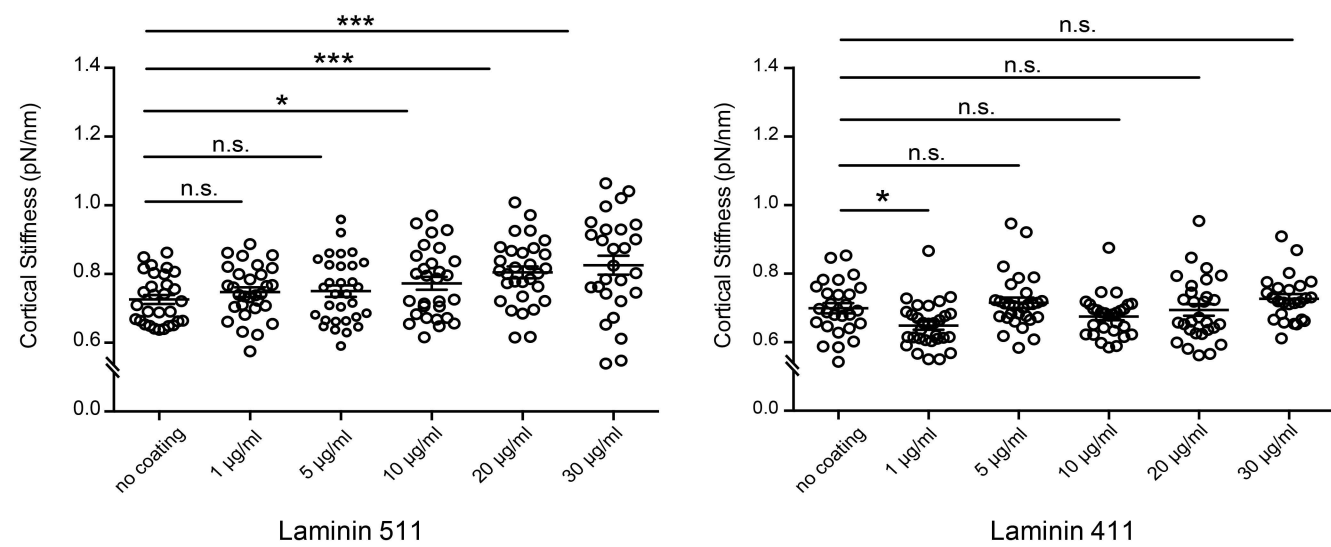

**Fig S6 AFM measures of endothelial cell cortical stiffness *in vivo* and *in vitro*.** A) Endothelial cell cortical stiffness on excised wild type aorta and mesenteric resistance artery shows no differences between the two vessel types. B) The cortical stiffness of sEND.1 seeded on increasing concentrations of purified laminins 511 and 411 show a concentration dependent increase in stiffness on laminin 511 and minimal effect in cells plated on laminin 411. Data shown are mean values  $\pm$  s.e.m from 3 experiments with triplicates/experiments n.s. = not significant, \*P<0.05, \*\*\*P<0.001, unpaired t-test.
